# Cutaneous tactile sensation and standing balance in children with autism: A Preliminary Report

Komal Kukkar<sup>1</sup>, Pranav J. Parikh<sup>1</sup>, Chyung Fen-Kao<sup>2</sup>, Sambit Mohapatra<sup>3</sup>

<sup>1</sup>Center for Neuromotor and Biomechanics Research, Department of Health and Human Performance, University of Houston, Houston, Texas.

<sup>2</sup>Cuomo First Step Early Childhood Center, Heartshare Human Services of New York, New York, NY

<sup>3</sup>The Department of Rehabilitation and Movement Science, The University of Vermont, Burlington, Vermont.

## Corresponding Author:

Komal Kukkar PT, MS  
Center for Neuromotor and Biomechanics Research,  
Department of Health and Human Performance,  
University of Houston,  
3875 Holman Street,  
Houston, Texas-77004.

Declarations of interest: None.

46 **ABSTRACT**

47 **BACKGROUND**

48 Autistic Spectrum Disorder (ASD) presents with a multitude of problems such as physical, social, emotional,  
49 psychological, etc. Most common physical problems are impairments in standing balance and posture. It is  
50 unknown whether these impairments have any association between tactile sensation or are purely due to  
51 deficits in sensory processing and integration. We hypothesized that foot tactile sensation in ASD is  
52 positively correlated to performance in standing balance as measured by Pediatric Balance scale.

53 **METHODS**

54 The data collected at Heartshare Human Services of New York was used for secondary analysis. It  
55 consisted of 12 participants and included: 1. Muscle and joint ROM testing to rule out any muscle  
56 involvement in balance problems. 2. Tactile sensation testing at four sites on sole of foot bilaterally using  
57 Semmes Weinstein monofilament. 3. Pediatric Balance Scale (PBS) for balance testing.

58 **RESULTS**

59 We found significant positive correlation between cutaneous tactile sensation (SWF) and Pediatric Balance  
60 scale (PBS) measures in our participants i.e., reduced tactile sensation was moderately associated with  
61 impaired balance score.

62 **CONCLUSIONS:**

63 We propose that during conventional clinical assessment for individuals with ASD, foot tactile sensation  
64 should not be overlooked, and included as a part of somato-sensory assessment. In addition, enhancing  
65 foot tactile sensation could also be used for targeted interventions to improve balance in children with ASD.

66 **KEY WORDS**

67 ASD, tactile, balance, posture.

## 68 1.0 INTRODUCTION

69 Autism spectrum disorders (ASDs) is a life-long developmental disorder of the brain affecting nearly 2 in  
70 1000 children in the United States (Bhat AN1, Landa RJ, 2011; Rapin I1, 1998). The average lifetime cost  
71 associated with direct medical expenses, rehabilitation costs, long-term care costs and special education  
72 amounts to nearly USD 3.2 million per person (Alcantara et al., 2011). Although early diagnosis of children  
73 with ASD is critical, it is often delayed until school age (Mandell et al., 2005). ASD can be classified into  
74 three types: a). Autistic disorder or classic autism; b). Asperger's syndrome, a mild form of autistic disorder;  
75 and c). Pervasive developmental disorder or atypical autism, which meets some of the criteria for autistic  
76 disorder or asperger syndrome. Neuroanatomic, pathologic, and neurobehavioral studies have suggested  
77 abnormalities in premotor (Mostofsky & Ewen, 2011), cerebellar, and parietal cortices (Haas et al., 1996)  
78 and in the thalamocortical connectivity in children with ASD leading to sensorimotor, sociocommunicative,  
79 and cognitive impairments (Nair A1, Treiber JM, Shukla DK, Shih P, 2013).

80 Children with ASD have a range of difficulties affecting the initiation, organization, and performance of  
81 movements leading to a range of movement problems (Maski et al., 2011). Most children with ASD present  
82 with problems maintaining balance while standing or during locomotion (Graham SA1, Abbott AE, Nair A,  
83 Lincoln AJ, Müller RA, n.d.; Stins & Emck, 2018). Maintenance of an upright stance requires continuous  
84 processing of visual, somatosensory, and vestibular systems to assess the stability of the body, and  
85 initiation of anticipatory and/or corrective neuro-muscular adjustments when challenged to keep the body's  
86 center of mass within the base of support (Horak, 2006; Shumway-Cook & Woollacott, 2000). Children with  
87 ASD when compared to age-matched typically developing children have been found to demonstrate an  
88 impaired ability to maintain an upright stance during static and dynamic tasks (Fournier KA1, Hass CJ, Naik  
89 SK, Lodha N, 2010; Mosconi, Wang, et al., 2015). These autistic children tend to rely more on sensory  
90 information for the control of balance. That is, when sensory information is blocked or removed, children  
91 with ASD demonstrate increased postural sway (Kohen-Raz et al., 1992; Minshew et al., 2004). Importantly,  
92 balance deficits in these children are more prominent during dynamic challenging tasks that require  
93 increased reliance on sensory information than a static task (Wang et al., 2016; Wang Z1, Hallac RR2,  
94 Conroy KC3, White SP3, Kane AA2, Collinsworth AL2, Sweeney JA4, 2016). Impaired balance control in

95 autistic children affects mobility and independence in activities of daily living, and may affect the ability to  
96 acquire manipulatory skills (Noterdaeme et al., 2002). Therefore, it is important to understand the underlying  
97 mechanisms.

98 Poor ability to control the balance may result from sensory processing deficits as well as impaired  
99 sensorimotor integration in ASD (Lim YH1, Partridge K2, Girdler S2, 2017). Difficulty processing  
100 somatosensory information including touch is common in ASD (Caminha & Lampreia, 2012). These children  
101 may show little or no response to sensory stimulation (Randell et al., 2019) or show heightened response  
102 to touch (Espenhahn et al., 2021). In addition, they have an impaired ability to localize or discriminate tactile  
103 stimulation problems (He et al., 2021; Hense et al., 2019), especially when in presence of another sensory  
104 stimulation such as visual distractors (Poole, 2018). Despite significant deficits in processing tactile  
105 information, there is a considerable lack of research understanding the contribution of impaired tactile  
106 sensation especially in the foot to balance deficits in ASD. In this secondary data analysis, we hypothesized  
107 that reduced tactile sensation in the foot will be associated with poor balance control as suggested by lower  
108 score on the Pediatric Berg Balance (PBS) scale in individuals with ASD.

## 109 **2.0 MATERIALS AND METHODS**

110 *2.1 Data:* This is a secondary data which was obtained from Heartshare Human Services of New York  
111 preschool. This data was collected at Heartshare by a physical therapist under the supervision of the head  
112 of the department as a part of standard routine of care. In this preliminary report, we included participants  
113 between 4 to 6 years of age with a diagnosis of autism spectrum disorder (ASD) and a history of imbalance  
114 or falls. Exclusion criteria included tightness in calf muscle and hip flexors or knee hyperextension. Twelve  
115 participants were met inclusion/exclusion criteria. This study was deemed exempt from Institutional Review  
116 Board (IRB) review by the IRB at the University of Vermont/University of Vermont Health Network (Exempt  
117 Criteria 45 CFR 46.104(d)(4)(ii)). The information was utilized by the authors in such a manner that the  
118 identity of the participants could not readily be ascertained directly or through identifiers linked to the  
119 participants, the authors did not contact the participants, and the authors will not re-identify participants.

120 *2.2 Data Collection:*

121 According to the department head, the following procedure was followed to collect the data:

122 *Assessment of Muscle tightness and Range of Motion*

123 Calf muscles- The participants were instructed to lie down prone on a therapy table with hands on the side.  
124 The PT placed the knee in 90 degrees of flexion and the ankle in a neutral position. Goniometer was placed  
125 on the ankle joint with fulcrum on the lateral malleolus with the proximal arm aligned to the lateral midline  
126 of fibula with fibular head as reference and the distal arm aligned to the lateral aspect of 5<sup>th</sup> metatarsal. The  
127 ankle was passively moved into dorsiflexion along with the distal arm of goniometer to measure dorsi-flexion  
128 range of motion. After this, the knee was extended, and the procedure was repeated to measure the ankle  
129 dorsi-flexion range of motion.

130 Hip flexors - Participants were instructed to lie down in the supine position on a therapy table with both  
131 knees on the edge of the table. The Thomas test was performed to assess tightness in the hip flexors. One  
132 knee was moved towards the chest and the participant was instructed to hold that position using both hands  
133 and let the other leg go down. This procedure was repeated with the opposite knee. If the leg that was not  
134 held by the subject reaches parallel to the therapy table or goes beyond, it ruled out hip flexor tightness of  
135 that leg.

136 Knee extensors- Participants were instructed to lie supine with both legs on a therapy table. Goniometer  
137 fulcrum was placed on the lateral epicondyle of femur with proximal arm along the lateral aspect of femur  
138 using greater trochanter for reference and the distal arm along the lateral aspect of fibula with the fibular  
139 head and lateral malleolus as reference. Then, the PT pushed the knee into hyperextension along with  
140 goniometer's distal arm with a hand placed under the ankle to measure the knee hyperextension range of  
141 motion.

142 *Assessment of Cutaneous Tactile Sensation:* This involved testing for cutaneous tactile sensation at four  
143 sites - great toe (GT), first metatarsal head (MT1), fifth metatarsal head (MT5) and heel (H) - on the plantar  
144 surface of each foot using a Semmes–Weinstein 5.07 (10g) monofilament. The inability to sense 5.07 SWM  
145 is indicative of the loss of protective sensation (Ünver & Akbaş, 2018). Participants laid flat with their back  
146 on a mat. Both feet were cleaned with cleaning wipes and labeled as 1(GT), 2(MT1), 3(MT5) and 4(H). A

147 couple of practice trials were performed to ensure the participants understood the testing process.  
148 Participants were instructed to keep their eyes closed before the filament touched the foot. The filament  
149 was touched with sufficient pressure applied to bend it for one second with the participants lying down.  
150 After filament was touched, participants were instructed to look at foot and either point out or number the  
151 site where the filament was touched. The examiner performed 24 trials (three trials at each of the four sites  
152 on either feet) in a random order. At each site, one trial was a “sham” in which the examiner did not touch  
153 the participant, but still asked for response. One point was awarded for each correct response (including a  
154 “no” response for a sham trial) for a total cutaneous tactile score of up to 24 points (12 points per foot).

155 *Functional/Clinical Outcome Measures:* Balance was assessed with the Pediatric Balance Scale (PBS),  
156 which is a 14-item performance-based assessment of balance related tasks (Casey et al., 2015). The PBS  
157 scale is a common clinical tool to assess balance and mobility and has been shown to have a strong positive  
158 correlation with the dynamic balance and gait ability (Evkaya et al., 2020). Each task is scored on an ordinal  
159 scale from 0 (unable) to 4 (independent). The sum of all scores was used as the final outcome score from  
160 a total score of 56.

### 161 *2.3 Data Analysis*

162 Data obtained was analyzed using SPSS software, version 24 (IBM, Inc, Chicago, IL). Descriptive data is  
163 presented in Table 1. Range of motion measurements were reported separately for either limb.  
164 Comparisons of cutaneous tactile sensation (SWF) scores were made with measures of balance (PBS) by  
165 Pearson’s correlation test. We classified the results according to the correlation coefficient (r) - very strong  
166 ( $r > 0.9$ ), strong (r from 0.7 to 0.9), moderate (r from 0.5 to 0.7), and weak (r from 0.3 to 0.5). Statistical  
167 significance was calculated at  $p < 0.05$ .

## 168 **3.0 RESULTS**

### 169 *3.1 Goniometry: Range of Motion*

170 Ankle ROM: With knee in 90 degrees of flexion, the average ROM for the left ankle was  $19.08 \pm 8.229$   
171 (mean  $\pm$  SD) degrees and the average ROM for the right ankle was  $19.42 \pm 7.669$  degrees. With knee fully

172 extended, the average ROM for the left ankle was  $8.5 \pm 2.75$  degrees and the average ROM for the right  
173 ankle was  $8.17 \pm 3.12$  degrees (**Table 1**).

174 Knee extension: Knee extension were tested bilaterally to rule out any knee hyperextension. The average  
175 ROM for the left knee hyperextension was  $1.5 \pm 4.78$  degrees and the average ROM for the right knee  
176 hyperextension was  $2.33 \pm 5.31$  degrees (**Table 1**).

### 177 3.2 Cutaneous Tactile Perception (SWF test)

178 The average ( $\pm$  SD) cutaneous tactile sensation score on SWF test was  $16.00 \pm 5.461$  out of a total possible  
179 score of 24 (**Table 1**).

### 180 3.3 Functional measures

#### 181 *Pediatric Berg Balance Scale (PBS)*

182 The average PBS score was  $45.92 \pm 5.316$  out of a total possible score of 56 (**Table 1**).

### 183 3.4 Correlations

184 We found significant moderate correlation ( $r=0.604$ ) between cutaneous tactile sensation (SWF) and  
185 Pediatric Berg Balance scale (PBS) score in our participants with ASD ( $r=0.604$ ;  $p=0.037$ ). Thus, reduced  
186 tactile sensation demonstrated moderate association with impaired balance (**Fig. 1**) explaining  
187 approximately 37% of the variance.

## 188 **4.0 Discussion**

189 Balance control is impaired in children with ASD. These impairments have been suggested to be due to  
190 sensorimotor abnormalities, which are also common in ASD and among the earliest manifestations of the  
191 disorder (Mosconi, Mohanty, et al., 2015). Individuals with ASD have severe difficulties in the integration of  
192 perceived stimuli into a meaningful entity (van Berckelaer-Onnes, 2004). Our secondary data analysis  
193 examined the relationship between cutaneous tactile sensation and standing balance. We found a  
194 moderate positive correlation between foot tactile sensation as measured by SWF and the clinically relevant  
195 balance function from the score on PBS.

196 *4.1 Cutaneous tactile sensation in ASD*

197 Impaired plantar cutaneous tactile sensation contributes to deficits in standing balance. This has been  
198 shown in individuals with neurological diseases such as stroke(Parsons et al., 2016) and multiple sclerosis  
199 (Citaker et al., 2011). In ASD, hypersensitivity or hyposensitivity to tactile sensation may result from inability  
200 to filter irrelevant sensory information. Whereas some studies have shown alteration of tactile stimuli in both  
201 adults and children with autism (Blakemore et al., 2006), others have shown tactile detection to be normal  
202 in autism (Cascio et al., 2008). These differences were primarily due to the differences in type and location  
203 of tactile stimulations. The data obtained consisted of the locations which were standardized for sensory  
204 testing in all the participants. It included four specific sites: Great Toe-GT, 1<sup>st</sup> and 5<sup>th</sup> Metatarsals- MT-1,  
205 MT-5, and Heel-H. Integrity of sensation in these regions is particularly relevant to maintenance of standing  
206 balance and posture. Also, a standardized clinical tool was used to assess tactile sensation, which is tested  
207 at a specific load (i.e., 10g) that discriminates intactness of protective tactile sensation. This was important  
208 as we were only looking at the association between these sensations and standing balance, which is also  
209 contributed by various other sensations.

210 *4.2 Cutaneous Tactile sensation and its relationship with balance.*

211 We found the tactile sensation explained 36% of the variation in the clinical balance score. This finding is  
212 consistent with a study done by Cruz et al on elderly where they found that foot tactile sensation strongly  
213 correlates with BBS (Cruz-Almeida Y1, Black ML2, Christou EA3, 2014), as well as with study by Pamela  
214 et al concluding strong correlation between SWME and lower limb physical performance (Carrer et al.,  
215 2018). This is important because poor balance potentially leads to frequent falls and secondary  
216 complications. Consequently, enhancing tactile sensation could become a targeted intervention to improve  
217 balance, and thus reduce falls. Thus, tactile sensation should not be overlooked and should be added to  
218 clinical assessment protocols for balance.

219 One limitation of this analysis was small sample size. A larger study is needed to confirm our observation.  
220 Also, results of our analysis should be interpreted carefully as this is a correlation between sensation and  
221 balance, but does not suggest causation.



222 **5.0 Implications and Future Directions**

223 Relationship between foot tactile sensation on feet and standing balance in individuals with ASD is crucial.  
224 This secondary analysis examined cutaneous tactile sensation in individuals with ASD and found that tactile  
225 sensation is most reduced in ASD individuals who have difficulties maintaining standing balance. The  
226 results of this analysis would be helpful for refining clinical assessment protocols so that somatosensory  
227 screening can be added to motor assessment protocols. In addition, ASD is a sensory processing disorder  
228 and future research should attempt at differentiating tactile sensation deficits with sensory processing  
229 problems so that an approximate causation can be reached, and targeted interventions can be delivered.

230

231 **Conflict of Interest**

232 All authors declare no conflict of interests, and were fully involved in the secondary data analysis and  
233 preparation of the manuscript. The material within has not been and will not be submitted for publication.

234

235

236

237

238

239

240

241

242

243

244

245 **Literature Cited:**

246

247 Alcantara, J., Alcantara, J. D., & Alcantara, J. (2011). A systematic review of the literature on the  
248 chiropractic care of patients with autism spectrum disorder. *Explore: The Journal of Science and*  
249 *Healing*, 7(6), 384–390. <https://doi.org/10.1016/j.explore.2011.08.001>

250 Bhat AN1, Landa RJ, G. JC. (2011). *Current perspectives on motor functioning in infants, children,*  
251 *and adults with autism spectrum disorders.*

252 Blakemore, S. J., Tavassoli, T., Calò, S., Thomas, R. M., Catmur, C., Frith, U., & Haggard, P. (2006).  
253 Tactile sensitivity in Asperger syndrome. *Brain and Cognition*, 61(1), 5–13.  
254 <https://doi.org/10.1016/j.bandc.2005.12.013>

255 Caminha, R. C., & Lampreia, C. (2012). Findings on sensory deficits in autism: Implications for  
256 understanding the disorder. *Psychology and Neuroscience*, 5(2), 231–237.  
257 <https://doi.org/10.3922/j.psns.2012.2.14>

258 Carrer, P., Trevisan, C., Curreri, C., Giantin, V., Maggi, S., Crepaldi, G., Manzato, E., & Sergi, G.  
259 (2018). Semmes-Weinstein Monofilament Examination for Predicting Physical Performance and  
260 the Risk of Falls in Older People: Results of the Pro.V.A. Longitudinal Study. *Archives of Physical*  
261 *Medicine and Rehabilitation*, 99(1), 137-143.e1. <https://doi.org/10.1016/j.apmr.2017.08.480>

262 Cascio, C., McGlone, F., Folger, S., Tannan, V., Baranek, G., Pelphrey, K. A., & Essick, G. (2008).  
263 Tactile perception in adults with autism: A multidimensional psychophysical study. *Journal of*  
264 *Autism and Developmental Disorders*, 38(1), 127–137. [https://doi.org/10.1007/s10803-007-](https://doi.org/10.1007/s10803-007-0370-8)  
265 0370-8

266 Casey, A. F., Quenneville-Himbeault, G., Normore, A., Davis, H., & Martell, S. G. (2015). A  
267 Therapeutic Skating Intervention for Children with Autism Spectrum Disorder. *Pediatric Physical*  
268 *Therapy*, 27(2), 170–177. <https://doi.org/10.1097/PEP.000000000000139>

269 Citaker, S., Gunduz, A. G., Guclu, M. B., Nazliel, B., Irkec, C., & Kaya, D. (2011). Relationship between  
270 foot sensation and standing balance in patients with multiple sclerosis. *Gait & Posture*, 34(2),  
271 275–278. <https://doi.org/10.1016/j.gaitpost.2011.05.015>

272 Cruz-Almeida Y1, Black ML2, Christou EA3, C. D. (2014). *Site-specific differences in the association*  
273 *between plantar tactile perception and mobility function in older adults.*

274 Espenhahn, S., Godfrey, K. J., Kaur, S., Ross, M., Nath, N., Dmitrieva, O., McMorris, C., Cortese, F.,  
275 Wright, C., Murias, K., Dewey, D., Protzner, A. B., McCrimmon, A., Bray, S., & Harris, A. D.  
276 (2021). Tactile cortical responses and association with tactile reactivity in young children on the  
277 autism spectrum. *Molecular Autism*, 12(1). <https://doi.org/10.1186/s13229-021-00435-9>

278 Evkaya, A., Karadag-Saygi, E., Karali Bingul, D., & Giray, E. (2020). Validity and reliability of the  
279 Dynamic Gait Index in children with hemiplegic cerebral palsy. *Gait and Posture*, 75, 28–33.  
280 <https://doi.org/10.1016/j.gaitpost.2019.09.024>

281 Fournier KA1, Hass CJ, Naik SK, Lodha N, C. J. (2010). *Motor coordination in autism spectrum*  
282 *disorders: a synthesis and meta-analysis.*

283 Graham SA1, Abbott AE, Nair A, Lincoln AJ, Müller RA, G. DJ. (n.d.). *The Influence of Task Difficulty*  
284 *and Participant Age on Balance Control in ASD.* Graham SA1, Abbott AE, Nair A, Lincoln AJ,  
285 Müller RA, G. D. (n.d.). *The Influence of Task Difficulty and Participant Age on Balance Control*  
286 *in ASD.*

- 287 Haas, R. H., Townsend, J., Courchesne, E., Lincoln, A. J., Schreibman, L., & Yeung-Courchesne, R.  
288 (1996). Neurologic abnormalities in infantile autism. *Journal of Child Neurology*, 11(2), 84–92.  
289 <https://doi.org/10.1177/088307389601100204>
- 290 He, J. L., Wodka, E., Tommerdahl, M., Edden, R. A. E., Mikkelsen, M., Mostofsky, S. H., & Puts, N.  
291 A. J. (2021). Disorder-specific alterations of tactile sensitivity in neurodevelopmental disorders.  
292 *Communications Biology*, 4(1). <https://doi.org/10.1038/s42003-020-01592-y>
- 293 Hense, M., Badde, S., Köhne, S., Dziobek, I., & Röder, B. (2019). Visual and Proprioceptive Influences  
294 on Tactile Spatial Processing in Adults with Autism Spectrum Disorders. *Autism Research*,  
295 12(12), 1745–1757. <https://doi.org/10.1002/aur.2202>
- 296 Horak, F. B. (2006). Postural orientation and equilibrium: What do we need to know about neural  
297 control of balance to prevent falls? *Age and Ageing*, 35(SUPPL.2).  
298 <https://doi.org/10.1093/ageing/afl077>
- 299 Kohen-Raz, R., Volkmar, F. R., & Cohen, D. J. (1992). Postural Control in Children with Autism 1. In  
300 *Journal of Autism and Developmental Disorders* (Vol. 22, Issue 3).
- 301 Lim YH1, Partridge K2, Girdler S2, M. S. (2017). *Standing Postural Control in Individuals with Autism*  
302 *Spectrum Disorder: Systematic Review and Meta-analysis*.
- 303 Mandell, D. S., Novak, M. M., & Zubritsky, C. D. (2005). Factors Associated With Age of Diagnosis  
304 Among Children With Autism Spectrum Disorders. *Pediatrics*, 116(6), 1480–1486.  
305 <https://doi.org/10.1542/peds.2005-0185>
- 306 Maski, K. P., Jeste, S. S., & Spence, S. J. (2011). Common neurological co-morbidities in autism  
307 spectrum disorders. In *Current Opinion in Pediatrics* (Vol. 23, Issue 6, pp. 609–615).  
308 <https://doi.org/10.1097/MOP.0b013e32834c9282>
- 309 Minshew, N. J., Sung, K., Jones, B. L., & Furman, J. M. (2004). *Underdevelopment of the postural*  
310 *control system in autism*.
- 311 Mosconi, M. W., Mohanty, S., Greene, R. K., Cook, E. H., Vaillancourt, D. E., & Sweeney, J. A. (2015).  
312 Feedforward and Feedback Motor Control Abnormalities Implicate Cerebellar Dysfunctions in  
313 Autism Spectrum Disorder. *Journal of Neuroscience*, 35(5), 2015–2025.  
314 <https://doi.org/10.1523/JNEUROSCI.2731-14.2015>
- 315 Mosconi, M. W., Wang, Z., Schmitt, L. M., Tsai, P., & Sweeney, J. A. (2015). The role of cerebellar  
316 circuitry alterations in the pathophysiology of autism spectrum disorders. In *Frontiers in*  
317 *Neuroscience* (Vol. 9, Issue SEP). Frontiers Media S.A.  
318 <https://doi.org/10.3389/fnins.2015.00296>
- 319 Mostofsky, S. H., & Ewen, J. B. (2011). Altered connectivity and action model formation in autism is  
320 autism. In *Neuroscientist* (Vol. 17, Issue 4, pp. 437–448).  
321 <https://doi.org/10.1177/1073858410392381>
- 322 Nair A1, Treiber JM, Shukla DK, Shih P, M. RA. (2013). *Impaired thalamocortical connectivity in*  
323 *autism spectrum disorder: a study of functional and anatomical connectivity*.
- 324 Noterdaeme, M., Mildenberger, K., Minow, F., & Amorosa, H. (2002). Evaluation of neuromotor deficits  
325 in children with autism and children with a specific speech and language disorder. *European*  
326 *Child and Adolescent Psychiatry*, 11(5), 219–225. <https://doi.org/10.1007/s00787-002-0285-z>
- 327 Parsons, S. L., Mansfield, A., Inness, E. L., & Patterson, K. K. (2016). The relationship of plantar  
328 cutaneous sensation and standing balance post-stroke. *Topics in Stroke Rehabilitation*, 23(5),  
329 326–332. <https://doi.org/10.1080/10749357.2016.1162396>

330 Poole, D. (2018). Supplemental Material for Visual-Tactile Selective Attention in Autism Spectrum  
331 Condition: An Increased Influence of Visual Distractors. *Journal of Experimental Psychology:*  
332 *General*. <https://doi.org/10.1037/xge0000425.supp>

333 Randell, E., McNamara, R., Delpont, S., Busse, M., Hastings, R. P., Gillespie, D., Williams-Thomas,  
334 R., Brookes-Howell, L., Romeo, R., Boadu, J., Ahuja, A. S., McKigney, A. M., Knapp, M., Smith,  
335 K., Thornton, J., & Warren, G. (2019). Sensory integration therapy versus usual care for sensory  
336 processing difficulties in autism spectrum disorder in children: Study protocol for a pragmatic  
337 randomised controlled trial. *Trials*, 20(1). <https://doi.org/10.1186/s13063-019-3205-y>

338 Rapin I1, K. R. (1998). *Neurobiology of autism*.

339 Shumway-Cook, A., & Woollacott, M. (2000). Attentional Demands and Postural Control: The Effect  
340 of Sensory Context. In *Journal of Gerontology: MEDICAL SCIENCES* (Vol. 55, Issue 1).  
341 <https://academic.oup.com/biomedgerontology/article/55/1/M10/545748>

342 Stins, J. F., & Emck, C. (2018). Balance performance in autism: A brief overview. In *Frontiers in*  
343 *Psychology* (Vol. 9, Issue JUN). Frontiers Media S.A. <https://doi.org/10.3389/fpsyg.2018.00901>

344 Ünver, B., & Akbaş, E. (2018). Effects of plantar sensitivity on balance and mobility in community-  
345 dwelling older adults: A Turkish study. *Australasian Journal on Ageing*, 37(4), 288–292.  
346 <https://doi.org/10.1111/ajag.12558>

347 van Berckelaer-Onnes, I. a. (2004). Sixty years of autism. *Nederlands Tijdschrift Voor Geneeskunde*,  
348 148(21), 1024–1030.

349 Wang, Z., Hallac, R. R., Conroy, K. C., White, S. P., Kane, A. A., Collinsworth, A. L., Sweeney, J. A.,  
350 & Mosconi, M. W. (2016). Postural orientation and equilibrium processes associated with  
351 increased postural sway in autism spectrum disorder (ASD). *Journal of Neurodevelopmental*  
352 *Disorders*, 8(1). <https://doi.org/10.1186/s11689-016-9178-1>

353 Wang Z1, Hallac RR2, Conroy KC3, White SP3, Kane AA2, Collinsworth AL2, Sweeney JA4, M. M.  
354 (2016). *Postural orientation and equilibrium processes associated with increased postural sway*  
355 *in autism spectrum disorder (ASD)*.

356

357

358

359

360

361

362

363

364

365

366

367

368 **FIGURE CAPTION:**

369

370 **Figure 1.** Correlation between foot tactile sensation and the score on the Pediatric Berg Balance (PBS)

371 scale. The tactile sensation measure explained inter-individual differences in the PBS score ( $r=0.604$ ;

372  $p=0.037$ ).

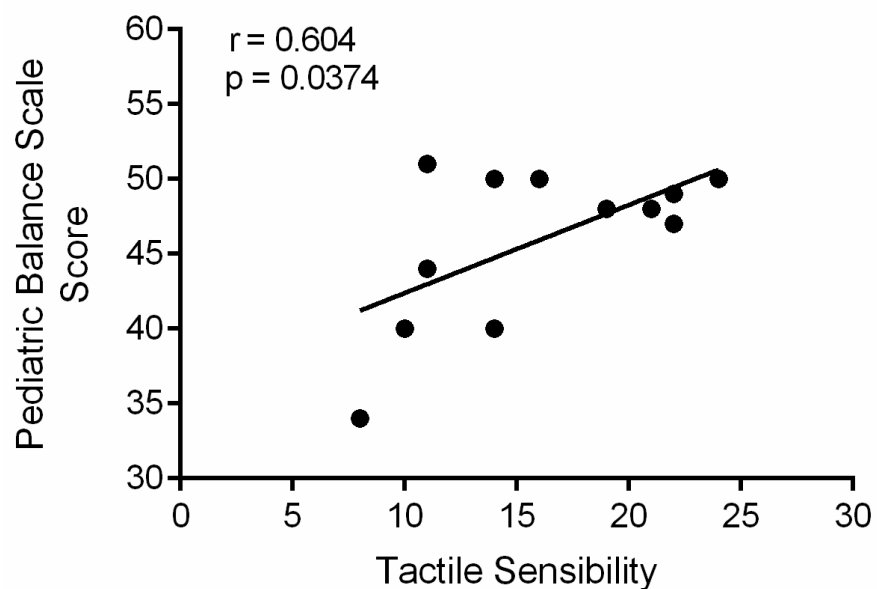

373

374

375

376

377

378

379

380

381

382

383 **Table 1.** Participant information.

| Patients | Tactile Sensibility | Balance Score | Knee Extension |       | Ankle Dorsiflexion with Knee Extension |       | Ankle Dorsiflexion with Knee Flexion |       |
|----------|---------------------|---------------|----------------|-------|----------------------------------------|-------|--------------------------------------|-------|
|          |                     |               | Left           | Right | Left                                   | Right | Left                                 | Right |
| 1        | 24.00               | 50.00         | -3.00          | -2.00 | 10.00                                  | 10.00 | 20.00                                | 20.00 |
| 2        | 19.00               | 48.00         | -2.00          | -2.00 | 15.00                                  | 15.00 | 39.00                                | 38.00 |
| 3        | 14.00               | 50.00         | -2.00          | -1.00 | 8.00                                   | 7.00  | 25.00                                | 25.00 |
| 4        | 21.00               | 48.00         | 0.00           | 0.00  | 10.00                                  | 10.00 | 25.00                                | 25.00 |
| 5        | 22.00               | 49.00         | 3.00           | 5.00  | 8.00                                   | 10.00 | 10.00                                | 15.00 |
| 6        | 16.00               | 50.00         | 12.00          | 12.00 | 6.00                                   | 6.00  | 12.00                                | 12.00 |
| 7        | 11.00               | 51.00         | 0.00           | 0.00  | 5.00                                   | 5.00  | 12.00                                | 12.00 |
| 8        | 14.00               | 40.00         | 0.00           | 0.00  | 6.00                                   | 3.00  | 10.00                                | 10.00 |
| 9        | 8.00                | 34.00         | 0.00           | 0.00  | 8.00                                   | 8.00  | 16.00                                | 16.00 |
| 10       | 10.00               | 40.00         | -2.00          | -2.00 | 10.00                                  | 8.00  | 20.00                                | 20.00 |
| 11       | 11.00               | 44.00         | 2.00           | 5.00  | 10.00                                  | 10.00 | 20.00                                | 18.00 |
| 12       | 22.00               | 47.00         | 10.00          | 13.00 | 6.00                                   | 6.00  | 20.00                                | 22.00 |

384

385

386
